# Supplementary material for: Patterns of genetic diversity in Phoenix canariensis, a widespread oceanic palm (species) endemic from the Canarian archipelago
Source: Springer Nature journal article supplement (doi:10.1007/s11295-014-0815-0), 2014-11-23
Supplement: 11295_2014_815_MOESM1_ESM.pdf [file 11295_2014_815_MOESM1_ESM.pdf]

**Patterns of genetic diversity in *Phoenix canariensis*, a widespread oceanic palm (species) endemic from the Canarian archipelago (Tree Genet Genomes)**

**I. Saro (corresponding autor) - P. A. Sosa - M. A. González-Pérez**

*Grupo de Biogeografía, Conservación y Territorio, Departamento de Biología, Campus de Tafira, Universidad de Las Palmas de Gran Canaria, 35017, Las Palmas de Gran Canaria, Canary Islands, Spain*

E-mail: [isaro@proyinv.es](mailto:isaro@proyinv.es) // Tel.: + 34 928 454543; Fax: + 34 928 452922

**M.A. González-Pérez - C. García-Verdugo**

*Departamento de Biodiversidad Molecular y Banco de ADN, Jardín Botánico Canario “Viera y Clavijo”- Unidad Asociada CSIC, Cabildo de Gran Canaria, 35017, Las Palmas de Gran Canaria, Canary Islands, Spain*

**Online Resource 1** Matrix of  $F_{ST}$  values for pairwise comparisons of *P. canariensis* populations estimated from microsatellites. See Fig. 1 and Table 1 for details of the populations and their codes

|     | PEP   | PBA   | TEC   | TMA   | GHE   | GMA   | GVR   | GJE   | LHA   | FMA   | FBT   | CST   | CMO   | CAR   | CAC |
|-----|-------|-------|-------|-------|-------|-------|-------|-------|-------|-------|-------|-------|-------|-------|-----|
| PEP |       |       |       |       |       |       |       |       |       |       |       |       |       |       |     |
| PBA | 0.037 |       |       |       |       |       |       |       |       |       |       |       |       |       |     |
| TEC | 0.111 | 0.090 |       |       |       |       |       |       |       |       |       |       |       |       |     |
| TMA | 0.140 | 0.127 | 0.098 |       |       |       |       |       |       |       |       |       |       |       |     |
| GHE | 0.075 | 0.046 | 0.057 | 0.075 |       |       |       |       |       |       |       |       |       |       |     |
| GMA | 0.176 | 0.149 | 0.045 | 0.102 | 0.075 |       |       |       |       |       |       |       |       |       |     |
| GVR | 0.171 | 0.148 | 0.040 | 0.096 | 0.074 | 0.025 |       |       |       |       |       |       |       |       |     |
| GJE | 0.078 | 0.057 | 0.055 | 0.081 | 0.021 | 0.085 | 0.086 |       |       |       |       |       |       |       |     |
| LHA | 0.071 | 0.073 | 0.078 | 0.121 | 0.070 | 0.117 | 0.114 | 0.078 |       |       |       |       |       |       |     |
| FMA | 0.267 | 0.241 | 0.164 | 0.238 | 0.193 | 0.201 | 0.183 | 0.206 | 0.124 |       |       |       |       |       |     |
| FBT | 0.285 | 0.268 | 0.185 | 0.247 | 0.223 | 0.219 | 0.200 | 0.220 | 0.133 | 0.058 |       |       |       |       |     |
| CST | 0.282 | 0.260 | 0.158 | 0.268 | 0.175 | 0.218 | 0.203 | 0.198 | 0.154 | 0.135 | 0.151 |       |       |       |     |
| CMO | 0.205 | 0.179 | 0.130 | 0.202 | 0.114 | 0.180 | 0.164 | 0.148 | 0.104 | 0.118 | 0.138 | 0.052 |       |       |     |
| CAR | 0.197 | 0.178 | 0.125 | 0.182 | 0.129 | 0.154 | 0.146 | 0.135 | 0.112 | 0.134 | 0.170 | 0.098 | 0.083 |       |     |
| CAC | 0.192 | 0.178 | 0.105 | 0.167 | 0.123 | 0.123 | 0.111 | 0.126 | 0.096 | 0.111 | 0.126 | 0.062 | 0.051 | 0.060 |     |
