# Supplementary material for: Patterns of genetic diversity in Phoenix canariensis, a widespread oceanic palm (species) endemic from the Canarian archipelago
Source: Springer Nature journal article supplement (doi:10.1007/s11295-014-0815-0), 2014-11-23

**Patterns of genetic diversity in *Phoenix canariensis*, a widespread oceanic palm (species) endemic from the Canary archipelago (Tree Genet Genomes)**

**I. Saro (corresponding autor) - P. A. Sosa - M. A. González-Pérez**

*Grupo de Biogeografía, Conservación y Territorio, Departamento de Biología, Campus de Tafira, Universidad de Las Palmas de Gran Canaria, 35017, Las Palmas de Gran Canaria, Canary Islands, Spain*

E-mail: [isaro@proyinves.ulpgc.es](mailto:isaro@proyinves.ulpgc.es) // Tel.: + 34 928 454543; Fax: + 34 928 452922

**M.A. González-Pérez - C. García-Verdugo**

*Departamento de Biodiversidad Molecular y Banco de ADN, Jardín Botánico Canario “Viera y Clavijo”- Unidad Asociada CSIC, Cabildo de Gran Canaria, 35017, Las Palmas de Gran Canaria, Canary Islands, Spain*

**Online Resource 2**

Neighbour-joining tree using 100 matrices based on the Nei's distance between *P. canariensis* populations, as implemented in PHYLIP v3.6. *P. dactylifera* served as the outgroup taxon. Numbers beside nodes indicate bootstrap support percentage recovered after 100 replicates. Populations are coded as in Fig. 1

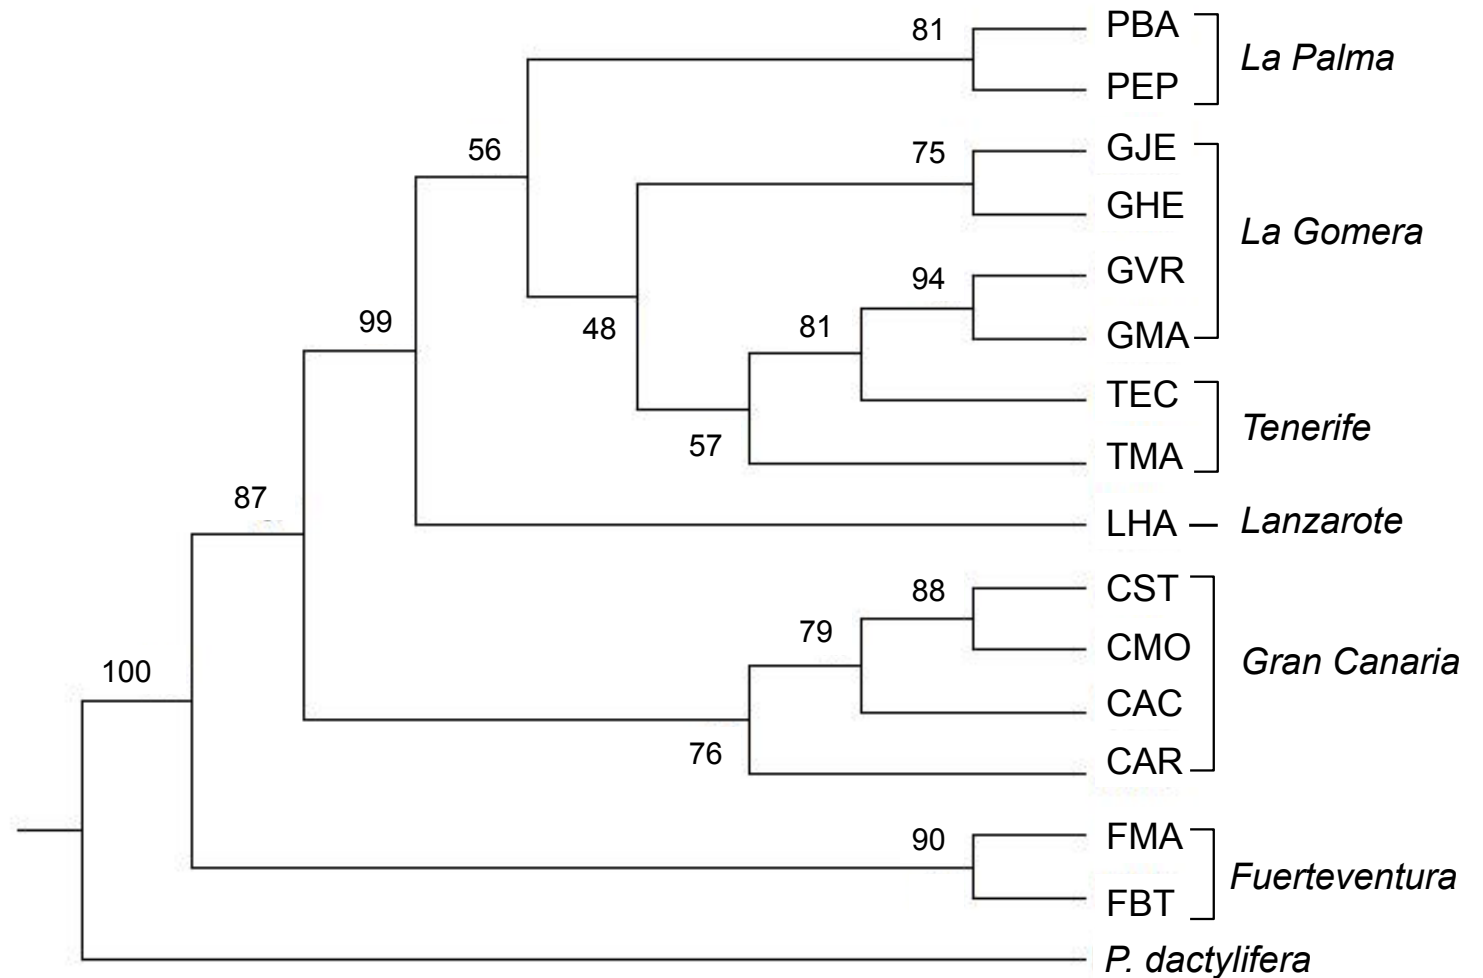

Supplement: 11295_2014_815_MOESM2_ESM.pdf [file 11295_2014_815_MOESM2_ESM.pdf]
